# Supplementary material
Source: Elsevier journal article supplement (https://www.sciencedirect.com/science/article/pii/S0210570519302213)
Supplement: mmc1 [file S0210570519302213:mmc1.docx]

**Supplementary Document 1. Recorded variables in the data collection sheet**

| Variables | Categories |
| --- | --- |
| General variables | |
| Record ID |  |
| Center |  |
| Demographic variables | |
| Sex | Male; Female |
| Age |  |
| Smoker | Yes, number of cigarettes per day; No; Past |
| Alcohol consumption | Yes, weekly dose; No |
| Previous neoplasm | Yes; No (specify) |
| Clinical variables | |
| Main symptom |  |
| Diagnosis date (month-year) |  |
| Presence of B symptoms | Fever; night sweats; weight loss >10% during the last 6 months; No |
| Physical examination | |
| Adenopathy | Yes, location; No; Not available |
| Oropharyngeal exploration | Yes; Normal; Pathological; Not available |
| Hepatomegaly | Yes; No; Not available |
| Splenomegaly | Yes, No; Not available |
| Others |  |
| Analytics (closest to the diagnosis). Printed analytics can be attached | |
| *Parameters* | |
| Hemoglobin | Value; Units; Normal: yes or no; Not available |
| Hematocrit | Value; Units; Normal: yes or no; Not available |
| MCV | Value; Units; Normal: yes or no; Not available |
| Platelets | Value; Units; Normal: yes or no; Not available |
| AST | Value; Units; Normal: yes or no; Not available |
| ALT | Value; Units; Normal: yes or no; Not available |
| ALP | Value; Units; Normal: yes or no; Not available |
| GGT | Value; Units; Normal: yes or no; Not available |
| Proteins | Value; Units; Normal: yes or no; Not available |
| Urea | Value; Units; Normal: yes or no; Not available |
| Creatinine | Value; Units; Normal: yes or no; Not available |
| Sodium | Value; Units; Normal: yes or no; Not available |
| Potassium | Value; Units; Normal: yes or no; Not available |
| Epstein Bahr | Positive; Negative; Undetermined |
| C Hepatitis | Positive; Negative; Undetermined |
| HIV | Positive; Negative; Undetermined |
| HbsAg + | Positive; Negative; Undetermined |
| Endoscopic (which led to the diagnosis if there was more than one) | |
| Lesion type | Erosive; Exophytic; Enlarged gastric folds; Normal gastroscopy |
| Location | Antrum; Body; Diffuse |
| Number of biopsies | Location: antrum or body |
| Histology | |
| MALT diagnosis | Low grade; High grade |
| Additional tests | |
| Chest X-ray | Normal; Pathological: describe; Not performed |
| Abdominal ultrasound | Normal; Pathological: describe; Not performed |
| GD transit study | Normal; Pathological: describe; Not performed |
| CT | Normal; Pathological: describe; Not performed |
| Bone marrow biopsy | Normal; Pathological: describe; Not performed |
| Staging | |
| Ann Arbor-Musshoff | EI (EI1, EI2); EII; EIII; EIV |
| H. pylori infection | |
| Infection | Yes; No; Not investigated |
| *Diagnostic method* | |
| Histology | Positive; Negative; Not determined |
| RUT | Positive; Negative; Not determined |
| UBT | Positive; Negative; Not determined |
| Serology | Positive; Negative; Not determined |
| Culture | Positive; Negative; Not determined |
| Fecal test | Positive; Negative; Not determined |
| PCR | Positive; Negative; Not determined |
| Treatment | |
| H. pylori eradication | Yes; No |
| *Test performed* | |
| Histology | Positive; Negative; Not determined |
| RUT | Positive; Negative; Not determined |
| UBT | Positive; Negative; Not determined |
| Chemotherapy | Yes, date and type; No |
| Surgery | Yes, date and type; No |
| Follow up | |
| Follow up | Yes, last visit date; No |
| Disease-free | Yes; No, date of relapse |
| Exitus | |
| Death | Yes, month/year of death; No |
| Cause of exitus | Lymphoma; Others, specify |
